# Supplementary material
Source: PubMed Central journal article supplement (PMC5892584)
Supplement: supp_RA117.000963_133918_1_supp_68183_p3k39k.pdf [file supp_RA117.000963_133918_1_supp_68183_p3k39k.pdf]

## Legends to the supplemental figures:

### Figure S1. Scheme of the adhesin GspB-F construct.

Full-length GspB contains a signal sequence (SS), a Ser/Thr-rich region 1 (SRR1), the binding region (BR), a second Ser/Thr-rich region 2 (SRR2), and a cell wall anchoring (CWA) motif. GspB-F is a fragment containing the indicated regions. GspB-F also contains C-terminal FLAG and His tags.

### Figure S2. Analysis of carbohydrates attached to GspB secreted from *S. gordonii*.

(A) Signal sequence containing FLAG-tagged GspB-F was expressed in *S. gordonii*. The secreted protein was purified and subjected to SDS-PAGE. After trypsin treatment, glycopeptides were extracted from gel slices, and the glycans were cleaved off by  $\beta$ -elimination, permethylated, and analyzed by MALDI-mass spectrometry (MS). Detected O-glycans are indicated. Hex – Hexose, HexNAc – N-acetyl hexosamine.

(B)  $\beta$ -eliminated glycans were permethylated and analyzed by ESI-mass spectrometry. Detected O-glycans are indicated.

(C) The HexHexNAc and Hex<sub>2</sub>HexNAc peaks in (B) with m/z ratios of 534.29 and 728.39, respectively, were further analyzed by tandem MS (collision-induced dissociation (CID) MS/MS), allowing the determination of the glycan sequence.

(D) Tryptic glycopeptides of the purified protein were subjected to hydrolysis with trifluoroacetic acid. Released monosaccharides were analyzed by anion exchange chromatography. The bottom panel shows quantification of the monosaccharide composition based on standards. The experiments in (B) -(D) together identified GlcNAc, GlcGlcNAc, and Glc<sub>2</sub>GlcNAc as the major glycans attached to GspB, but other glycans were detected that contained GalNAc, Gal, and Man.

### Figure S3. Glycans attached to GspB when expressed together with GtfA/B, Nss, and Gly in *E. coli*.

(A) His-tagged GspB-F was purified from *E. coli* cells expressing GtfA/B, Nss, and Gly, and subjected to SDS-PAGE.  $\beta$ -eliminated glycans were analyzed by MALDI-mass spectrometry (MS). Detected O-glycans are indicated. Hex – Hexose, HexNAc – N-acetyl hexosamine.

(B)  $\beta$ -eliminated glycans were permethylated and analyzed by ESI-mass spectrometry. Detected O-glycans are indicated.

(C) The HexHexNAc and Hex<sub>2</sub>HexNAc peaks in (B) with m/z ratios of 534.29 and 728.39, respectively, were further analyzed by tandem MS (collision-induced dissociation (CID) MS/MS) to determine the glycan sequence.

(D) Tryptic glycopeptides of the purified protein were subjected to hydrolysis with trifluoroacetic acid. Released monosaccharides were analyzed by anion exchange chromatography. Quantification of the monosaccharide composition is based on standards and is shown in the bottom panel.

(E) Purified GspB-F was treated with trypsin. A tryptic peptide derived from the first Ser/Thr-rich segment (residues 126-135) was analyzed by tandem mass spectrometry.

The identified peaks contain Ser or Thr residues modified with either N-acetyl hexosamine (squares) alone or additionally with hexoses (spheres). Red and green indicate unambiguous and ambiguous assignments, respectively.

**Figure S4. The Asp proteins do not affect O-glycosylation.**

Gsp-F was synthesized *in vitro* in the presence of <sup>35</sup>S-methionine and then incubated with the indicated glycosyltransferases and UDP-sugars in the absence or presence of Asp1, Asp1/3, or Asp1/2/3. C, control.

**Figure S5. Sequence alignment of regions of Asp1 and Asp3.**

(A) Asp1 proteins from different bacterial species contain two conserved Asp residues (D33 and D34 in *S. gordinii*; colored in red). These residues are located in the cleft between R-folds I and II. The conserved residue shown in blue was mutated, but has no effect on secretion (Figure 4B).

(B) Asp3 has a conserved Asn, often preceded by a Glu residue (N46 and E45 in *S. gordinii*; colored in red), which are located at the tip of a  $\beta$ -strand. Residues in blue were mutated and had a moderate secretion defect (Figure 4D).

**Figure S6. Complex formation of the Asps.**

(A) The Asp1/3 complex was subjected to gel filtration coupled with multi-angle light scattering (SEC-MALS). The refractive index was monitored and the molecular mass of the complex calculated at different elution times.

(B) Asp1, Asp2, and Asp3 were co-purified and subjected to gel filtration. Shown is the UV absorbance profile. Fractions of the peak were subjected to SDS-PAGE and Coomassie blue staining.

(C) Table summarizing the results of SEC-MALS. In the case of Asp1/Asp2/Asp3, both monomers and dimers were detected.

**Figure S7. 2D class averages of negatively stained Asp complexes.**

(A) 2D class averages of negatively stained MBP-Asp1/Asp3 particles.

(B) As in (A), but for the MBP-Asp1/MBP-Asp2/Asp3 complex.

(C) As in (A), but for the Asp1/MBP-Asp2/Asp3 complex.

(D) As in (A), but for the Asp1/Asp2/Asp3 dimer.

(E) As in (A), but for the Asp1/Asp2/Asp3 monomer.

The box dimensions are 336 Å in (B), and 215 Å in all other panels.

**Figure S8. Flotation of liposomes in a Nycodenz gradient.**

Liposomes containing Texas Red 1,2-Dihexadecanoyl-*sn*-Glycero-3-Phosphoethanolamine (DHPE) were subjected to flotation in a Nycodenz gradient. Fractions were collected from the top and analyzed for absorbance at 594 nm.

**Figure S9. SecA2 has a pronounced positively charged surface patch facing the membrane.**

(A) Homology model for SecA2 in cartoon presentation, viewed from the membrane. SecA2's domains are shown in different colors. NBD1 and NBD2, nucleotide-binding domains 1 and 2; PPXD, polypeptide crosslinking domain; HWD, helical wing domain; HSD, helical scaffold domain.

(B) Surface of SecA2 facing the membrane. Note that the surface is highly positively charged (blue). The electrostatic surface was calculated with the Adaptive Poisson-Boltzmann Solver, as implemented in Pymol, using a scale from -5.000 to 5.000 (bottom).

(C) As in (B), but for a homology model for *S. gordonii* SecA1. Note that the equivalent surface is much less positively charged than in SecA2.

Figure S1

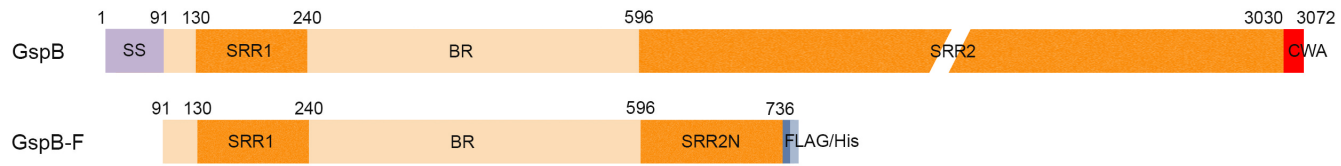

# Figure S2

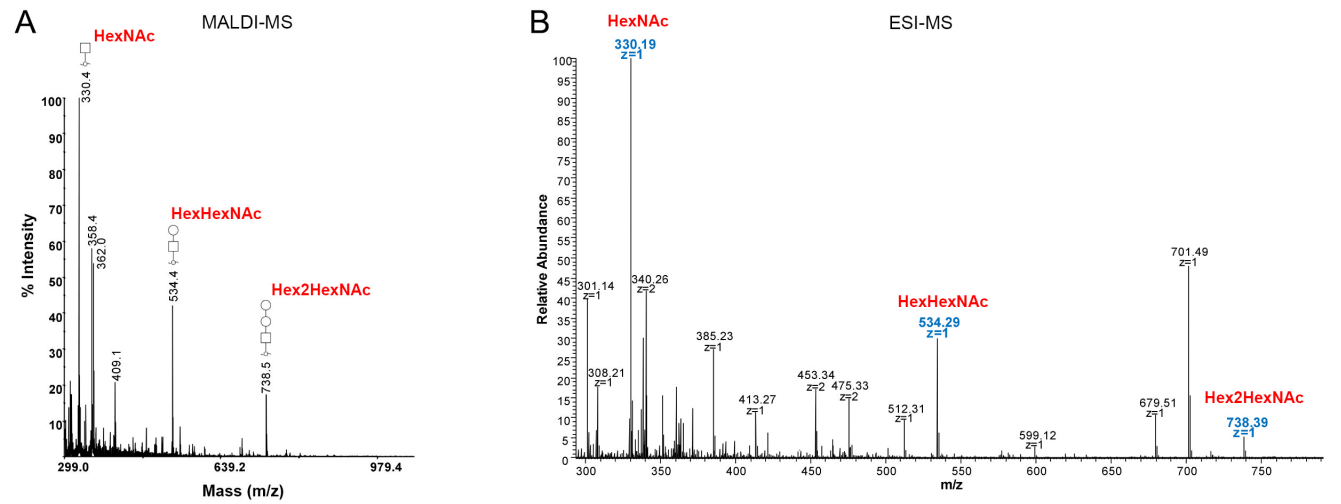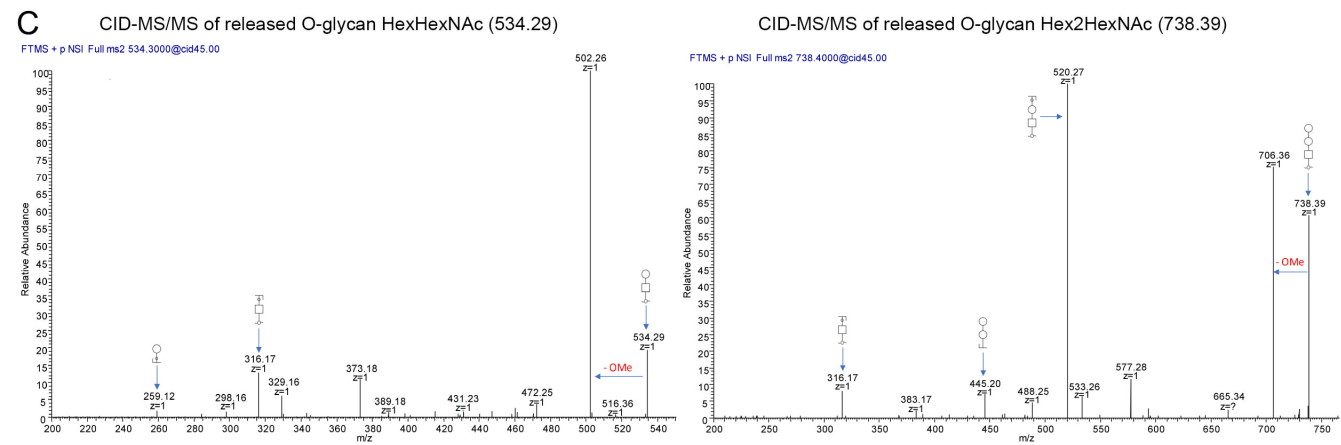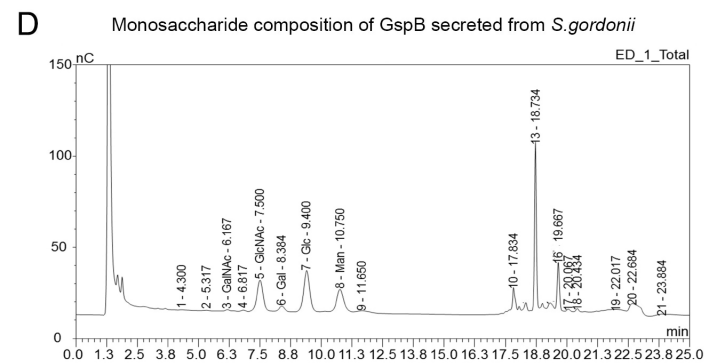

| Residue | Micrograms | Nanomoles | % by mole |
|---------|------------|-----------|-----------|
| Fuc     | nd         | -         | -         |
| GalNAc  | 0.009      | 0.04      | 2.29      |
| GlcNAc  | 0.158      | 0.71      | 38.11     |
| Gal     | 0.024      | 0.13      | 6.98      |
| Glc     | 0.102      | 0.56      | 30.13     |
| Man     | 0.076      | 0.42      | 22.49     |

# Figure S3

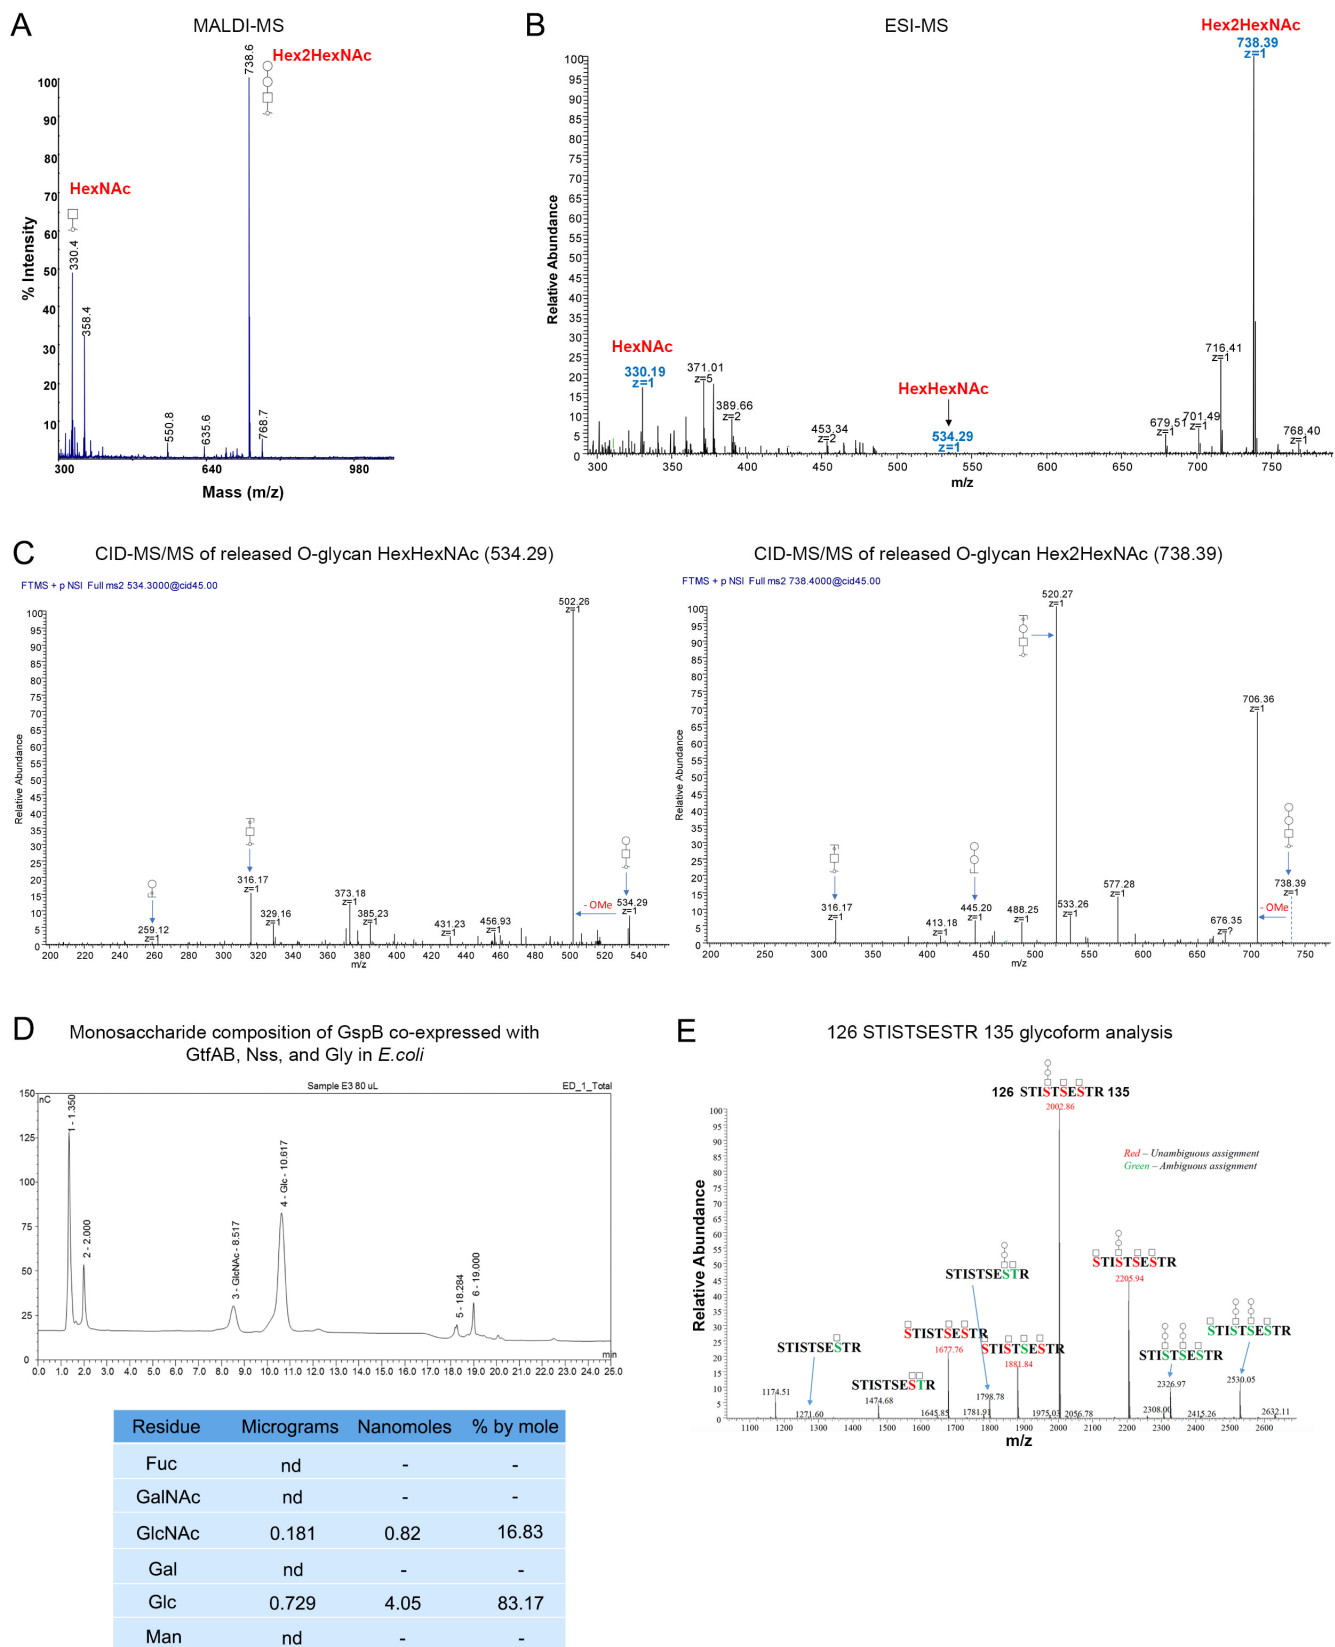

Figure S4

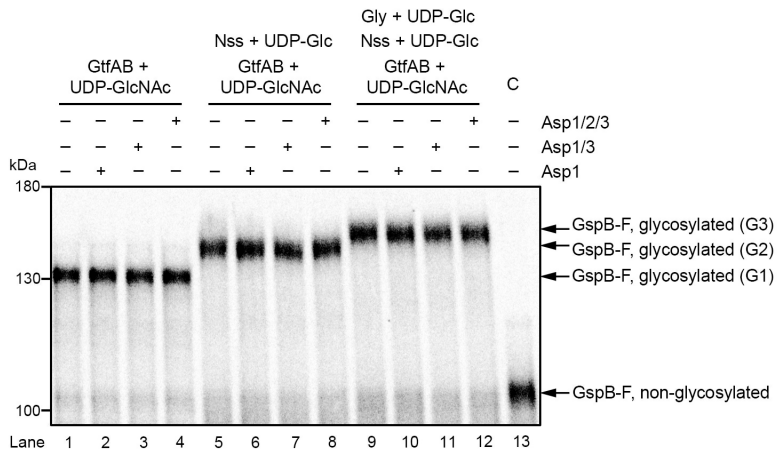

# Figure S5

## A Asp1 (Partial sequences)

|                                     |    |                                                 |    |     |                        |     |
|-------------------------------------|----|-------------------------------------------------|----|-----|------------------------|-----|
| <i>Streptococcus gordonii</i>       | 19 | DIIPWYRSMQRL <b>EFDD</b> TIHQIRIFHSENLP         | 48 | 254 | ILSFFH <b>ERN</b> QASN | 266 |
| <i>Streptococcus pneumoniae</i>     | 18 | DVTPWYYSFR <b>EFDD</b> TFNQIRLFQRQDIP           | 47 | 253 | ILSLF <b>INR</b> NAQAS | 265 |
| <i>Streptococcus sanguinis</i>      | 19 | DIIPWYRSMQRL <b>EFDD</b> TIHQIRIFQSENLP         | 48 | 254 | ILSFFH <b>ERN</b> HTVT | 266 |
| <i>Streptococcus parasanguinis</i>  | 18 | DTPWWFRVKNRMT <b>FD</b> SVNQVKMFLOGQEE          | 47 | 256 | IYSFFGN <b>R</b> FNLEN | 268 |
| <i>Streptococcus salivarius</i>     | 19 | VIDPWYRIRQKI <b>EFDD</b> SLHQVRIFQDEDLA         | 48 | 252 | ILTWFA <b>ERN</b> QDDS | 264 |
| <i>Streptococcus mitis</i>          | 18 | DMIPWYHSQFR <b>EFDD</b> TFNQIRLFQRQGIP          | 47 | 253 | ILSLF <b>INR</b> NSQAS | 265 |
| <i>Streptococcus oralis</i>         | 18 | DLTPWYFHSFKL <b>EFDD</b> TFNQIRLMNRQGIP         | 47 | 253 | VLSLF <b>IGR</b> NPQEQ | 265 |
| <i>Streptococcus agalactiae</i>     | 18 | NNYLWYFKPTNVGF <b>DD</b> TINQMKMFDYAGKE         | 47 | 252 | ILSVF <b>SERN</b> NAHN | 264 |
| <i>Streptococcus vestibularis</i>   | 19 | AIDPWYRIRQKI <b>EFDD</b> SLHQVRIFQDEDLA         | 48 | 252 | ILTWFA <b>ERN</b> QEDK | 264 |
| <i>Streptococcus urinalis</i>       | 18 | KTSVWYRRAAGM <b>DFDD</b> TINHVKMFQYIDYQ         | 47 | 253 | LVSFV <b>SLR</b> NKKED | 265 |
| <i>Streptococcus porcinus</i>       | 18 | DTKEWTHINQYLQ <b>FD</b> SVNQIKVFHDNQEN          | 47 | 252 | IFS <b>FYQ</b> SQRQLDS | 264 |
| <i>Staphylococcus aureus</i>        | 18 | TTVPYYQLQNK <b>TEFDD</b> MISLMGMHLENDLD         | 47 | 251 | SYS <b>FFKNR</b> NETVS | 263 |
| <i>Staphylococcus epidermidis</i>   | 18 | TSRPFYLLKQY <b>DFDD</b> MISLMTMHSSNNVD          | 47 | 251 | CFS <b>IFT</b> ERNKVV  | 263 |
| <i>Staphylococcus capitis</i>       | 18 | TSVPFYQKRQY <b>DFDD</b> MISLMTMHSSKNNVD         | 47 | 251 | CFS <b>VFT</b> ERNKKV  | 263 |
| <i>Staphylococcus hyicus</i>        | 18 | QAQPFRRKRT <b>TEFDD</b> IISLMSMHYQNDNH          | 47 | 251 | CYS <b>VFK</b> QRNTNLD | 263 |
| <i>Staphylococcus saprophyticus</i> | 18 | NTLPFYYPKDK <b>DFDD</b> MISLMSMHKKNGYE          | 47 | 250 | CFS <b>LSFN</b> RNREIT | 262 |
| <i>Staphylococcus pasteurii</i>     | 18 | LNQPFYIKNAM <b>IEFDD</b> SISLMSMHKNDDED         | 47 | 250 | YYS <b>IFS</b> KRNRTID | 262 |
| <i>Lactobacillus salivarius</i>     | 18 | AFPEWYFTTNK <b>MEFDD</b> TVNQIMMFKQSEEK         | 47 | 249 | IMS <b>IFS</b> NRLDIDQ | 261 |
| <i>Lactobacillus oris</i>           | 15 | ----WAYTVP <b>MEFDD</b> AVSHLQILRDDQOP          | 40 | 244 | VFSAS-- <b>R</b> WHPYR | 254 |
| <i>Lactobacillus reuteri</i>        | 15 | ----WAHTIP <b>KEFDD</b> AVSHIKVFQTNQKP          | 40 | 243 | IFSLS-- <b>R</b> WHRYH | 253 |
| <i>Leuconostoc gelidum</i>          | 13 | -----KAT <b>TFDD</b> TVNQIRMFEAVHEN             | 33 | 240 | VLS <b>FFKNR</b> YRYKK | 252 |
| <i>Aerococcus urinae</i>            | 17 | ----GEP <b>S</b> YMDLY <b>FD</b> TVNQRLRFQRAEEA | 42 | 249 | VYS <b>LYS</b> QRSFDSQ | 261 |
| <i>Oenococcus oeni</i>              | 13 | -----FR <b>P</b> TF <b>DD</b> TVHQIKIFKKNLP     | 34 | 239 | VLS <b>YF</b> SNRYDFQD | 251 |
| <i>Facklamia sourekkii</i>          | 18 | RLDGSSLRG <b>FL</b> EF <b>DD</b> TVNQLRMFQEAEEA | 47 | 250 | ALS <b>LFQ</b> LRNPSYQ | 262 |
|                                     |    | *** . : :                                       |    |     | : *                    |     |

## B Asp3 (Partial sequences)

|                                        |    |                                                                               |    |    |                                                                                                                                                                        |     |
|----------------------------------------|----|-------------------------------------------------------------------------------|----|----|------------------------------------------------------------------------------------------------------------------------------------------------------------------------|-----|
| <i>Streptococcus gordonii</i>          | 44 | F <b>EN</b> KLIASGQTI <b>HEW</b>                                              | 58 | 97 | FL <b>K</b> LIFFDRYNREVS <b>NH</b> VERS <b>DK</b> MFT <b>TY</b> PEEAYS <b>YK</b> V <b>QLL</b>                                                                          | 136 |
| <i>Streptococcus pneumoniae</i>        | 43 | F <b>EN</b> EMISSGTM <b>VHEW</b>                                              | 57 | 96 | YF <b>R</b> LIFKDRYDEKVS <b>QL</b> IKKDL <b>TF</b> T <b>TY</b> PEEAY <b>NS</b> I <b>QLL</b>                                                                            | 135 |
| <i>Streptococcus mitis</i>             | 43 | F <b>EN</b> SMVNSGTMI <b>HEW</b>                                              | 57 | 96 | YF <b>R</b> LIFMDRYDKQVDQ <b>VI</b> EKDF <b>DF</b> T <b>TY</b> PEEAY <b>HY</b> K <b>QLL</b>                                                                            | 135 |
| <i>Streptococcus sanguinis</i>         | 44 | F <b>EN</b> KLMASGQTI <b>HEW</b>                                              | 58 | 97 | FL <b>K</b> IIFFDRYDKEIS <b>NQ</b> VERSE <b>SM</b> I <b>F</b> T <b>TY</b> PKEAYS <b>YK</b> V <b>QLL</b>                                                                | 136 |
| <i>Streptococcus infantis</i>          | 43 | F <b>EN</b> SMVNSGTMI <b>HEW</b>                                              | 57 | 96 | YF <b>R</b> LIFMDRYNKQVDQ <b>VI</b> EKDF <b>DF</b> T <b>TY</b> PEEAY <b>HY</b> K <b>QLL</b>                                                                            | 135 |
| <i>Streptococcus parasanguinis</i>     | 38 | F <b>K</b> NPLMP <b>SG</b> QIL <b>K</b> TW                                    | 52 | 91 | MVE <b>I</b> VFLDRFGVPV <b>KR</b> QV <b>TS</b> DGS <b>L</b> AFV <b>Y</b> PENAYAYEV <b>RL</b> L                                                                         | 130 |
| <i>Streptococcus salivarius</i>        | 34 | F <b>Y</b> NPLVPSGTEI <b>Q</b> SW                                             | 48 | 87 | FL <b>K</b> VSFLDRYDNEI <b>K</b> OLIEK <b>GT</b> MT <b>FV</b> YPHEAY <b>TY</b> R <b>IS</b> LL                                                                          | 126 |
| <i>Streptococcus vestibularis</i>      | 34 | F <b>Y</b> NPLVPSGTEI <b>Q</b> SW                                             | 48 | 87 | FL <b>K</b> VSFLDRYDNEI <b>K</b> OLIEK <b>ST</b> Q <b>MT</b> F <b>V</b> YPHEAY <b>TY</b> R <b>IS</b> LL                                                                | 126 |
| <i>Streptococcus oralis</i>            | 34 | L <b>K</b> NPLLASGETL <b>K</b> TW                                             | 48 | 87 | YL <b>K</b> L <b>T</b> FLNRYEE <b>I</b> IEEK <b>IE</b> RQ <b>F</b> S <b>F</b> T <b>TY</b> PETAY <b>TY</b> R <b>LS</b> LI                                               | 126 |
| <i>Streptococcus thoralensis</i>       | 30 | F <b>N</b> NSLMP <b>SG</b> QVIN <b>R</b> W                                    | 44 | 83 | ILQ <b>I</b> TFYDRFN <b>RS</b> LN <b>SV</b> TL <b>KN</b> DN <b>HS</b> VF <b>Y</b> PEGAYAYDIS <b>L</b> V                                                                | 122 |
| <i>Streptococcus halotolerans</i>      | 30 | F <b>K</b> NHLM <b>PS</b> GQVIN <b>C</b> W                                    | 44 | 83 | MLQ <b>I</b> TFYDR <b>FR</b> SLET <b>IT</b> L <b>KN</b> G <b>K</b> TS <b>FV</b> Y <b>P</b> QAYAYDIS <b>L</b> I                                                         | 122 |
| <i>Staphylococcus aureus</i>           | 34 | F <b>N</b> NPLMP <b>SG</b> TVI <b>H</b> DW                                    | 48 | 87 | YI <b>K</b> ITFYR <b>K</b> NDTE <b>HS</b> N <b>LI</b> IQ <b>NS</b> DA <b>EF</b> FE <b>F</b> PEEAYAY <b>K</b> IEL <b>I</b>                                              | 126 |
| <i>Staphylococcus schleiferi</i>       | 34 | F <b>Q</b> NELMP <b>SG</b> I <b>VI</b> HQW                                    | 48 | 87 | YF <b>K</b> IIFK <b>HR</b> DNT <b>VC</b> D <b>V</b> Q <b>I</b> IL <b>G</b> HEAE <b>VR</b> MP <b>Q</b> QAF <b>NY</b> EL <b>Q</b> MI                                     | 126 |
| <i>Staphylococcus epidermidis</i>      | 34 | F <b>EN</b> PLMP <b>SG</b> T <b>II</b> HSW                                    | 48 | 87 | YF <b>K</b> M <b>K</b> FYR <b>K</b> NKE <b>IL</b> SH <b>Q</b> IL <b>KN</b> K <b>EN</b> IV <b>Y</b> PREAYS <b>Y</b> ELE <b>L</b> I                                      | 126 |
| <i>Staphylococcus capitis</i>          | 34 | F <b>EN</b> PLMP <b>SG</b> TVI <b>H</b> NW                                    | 48 | 87 | YF <b>K</b> IKFYR <b>N</b> NKE <b>Q</b> FE <b>Y</b> K <b>I</b> IK <b>N</b> KE <b>EE</b> IV <b>Y</b> PLEA <b>HS</b> Y <b>Q</b> EL <b>V</b>                              | 126 |
| <i>Lactobacillus oligofermentans</i>   | 34 | F <b>K</b> NERV <b>SP</b> GLAV <b>H</b> RW                                    | 48 | 87 | GLQ <b>I</b> Q <b>FF</b> DEAG <b>L</b> VIDE <b>CL</b> VR <b>TS</b> Q <b>VD</b> F <b>V</b> VPAG <b>M</b> VS <b>Y</b> E <b>I</b> DL <b>I</b>                             | 126 |
| <i>Lactobacillus murinus</i>           | 34 | F <b>EN</b> KLM <b>SP</b> G <b>K</b> TV <b>N</b> TW                           | 48 | 87 | YL <b>R</b> LDFYDR <b>SD</b> L <b>V</b> IK <b>Q</b> IF <b>IK</b> EM <b>EE</b> AF <b>Y</b> PD <b>G</b> AY <b>Y</b> Y <b>T</b> IS <b>L</b> L                             | 126 |
| <i>Leuconostoc pseudomesenteroides</i> | 34 | F <b>K</b> NDR <b>F</b> PS <b>G</b> TK <b>I</b> HT <b>W</b>                   | 48 | 87 | Y <b>V</b> Q <b>I</b> IFF <b>NR</b> F <b>H</b> DIV <b>DR</b> VI <b>A</b> K <b>NEE</b> Q <b>K</b> FL <b>Y</b> PEAA <b>Y</b> Y <b>Y</b> E <b>I</b> S <b>L</b> L          | 126 |
| <i>Leuconostoc gelidum</i>             | 34 | F <b>Q</b> N <b>D</b> L <b>F</b> S <b>A</b> G <b>S</b> F <b>V</b> HT <b>W</b> | 48 | 87 | YL <b>Q</b> FK <b>F</b> YDRY <b>ED</b> M <b>IS</b> VT <b>IK</b> NG <b>V</b> G <b>K</b> FL <b>Y</b> P <b>N</b> NAYAY <b>S</b> MA <b>L</b> I                             | 126 |
| <i>Enterococcus cecorum</i>            | 34 | F <b>K</b> N <b>V</b> Q <b>L</b> AS <b>G</b> K <b>Q</b> IV <b>A</b> W         | 48 | 87 | YL <b>K</b> IIF <b>Y</b> N <b>R</b> L <b>D</b> EE <b>I</b> GT <b>VI</b> Q <b>RE</b> D <b>V</b> Q <b>E</b> F <b>Y</b> PD <b>G</b> AF <b>RY</b> D <b>IL</b> VI           | 126 |
| <i>Aerococcus urinae</i>               | 33 | F <b>K</b> N <b>T</b> LMP <b>SG</b> ER <b>I</b> TS <b>W</b>                   | 47 | 86 | FF <b>K</b> IS <b>F</b> FD <b>Y</b> Y <b>G</b> GG <b>P</b> IE <b>Y</b> Y <b>L</b> R <b>T</b> PS <b>D</b> Y <b>F</b> TP <b>D</b> T <b>Y</b> NY <b>E</b> IA <b>L</b> H   | 125 |
| <i>Oenococcus oeni</i>                 | 36 | F <b>EN</b> SLMP <b>SS</b> V <b>II</b> HS <b>W</b>                            | 50 | 89 | Y <b>T</b> Q <b>I</b> S <b>F</b> Y <b>D</b> IA <b>K</b> TR <b>I</b> KT <b>IN</b> IK <b>ES</b> RG <b>TF</b> I <b>Y</b> PK <b>NS</b> F <b>S</b> Y <b>R</b> ID <b>L</b> I | 128 |
| <i>Facklamia sourekkii</i>             | 39 | F <b>EN</b> ELL <b>PS</b> G <b>K</b> RI <b>H</b> TS <b>W</b>                  | 53 | 92 | F <b>V</b> EL <b>S</b> F <b>Y</b> DRY <b>DN</b> LI <b>Q</b> AV <b>Y</b> V <b>K</b> D <b>G</b> Q <b>ED</b> F <b>Q</b> V <b>PL</b> GT <b>Y</b> Y <b>H</b> MS <b>L</b> F  | 131 |
|                                        |    | : * . . : *                                                                   |    |    | . . * . * * : :                                                                                                                                                        |     |



Figure S6

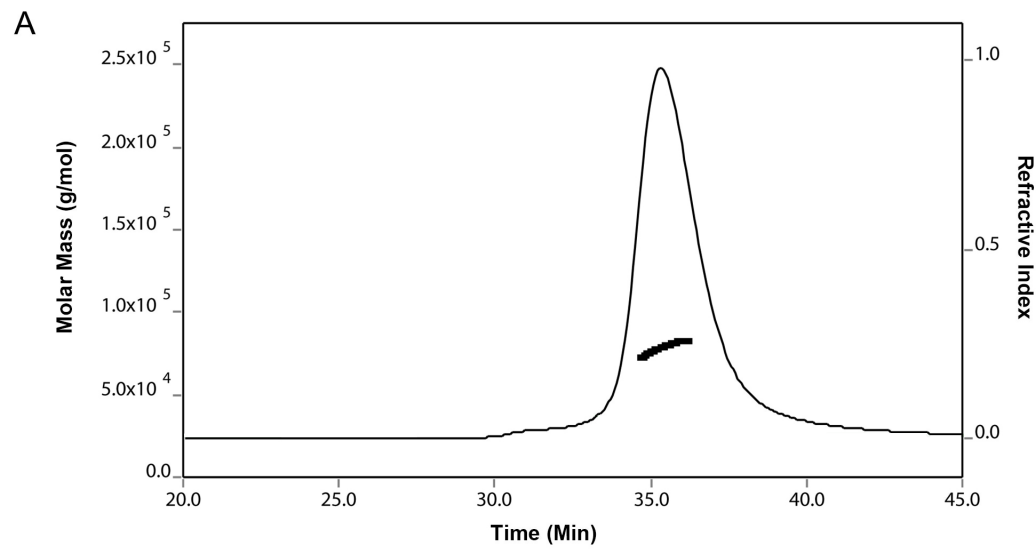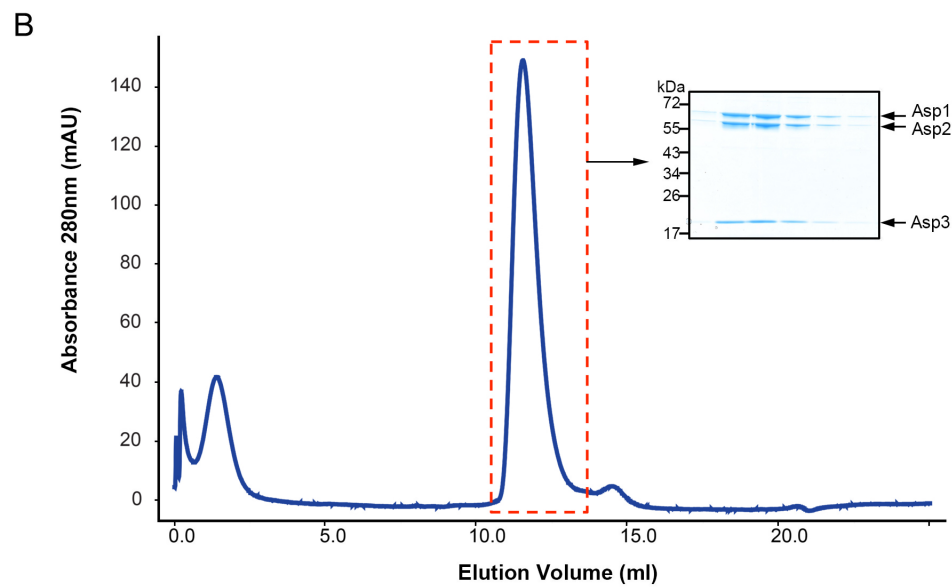

**C**

| Protein complex    | Molecular weight (kDa) |                    |                    |
|--------------------|------------------------|--------------------|--------------------|
|                    | Measured               | Calculated (1:1:1) | Calculated (2:2:2) |
| Asp1/Asp2/Asp3     | 241.50                 | 141.60             | 283.20             |
| Asp1/MBP-Asp2/Asp3 | 181.80                 | 184.13             |                    |
| Asp1/GST-Asp2/Asp3 | 335.00                 |                    | 335.48             |

Figure S7

A

MBP-Asp1/Asp3

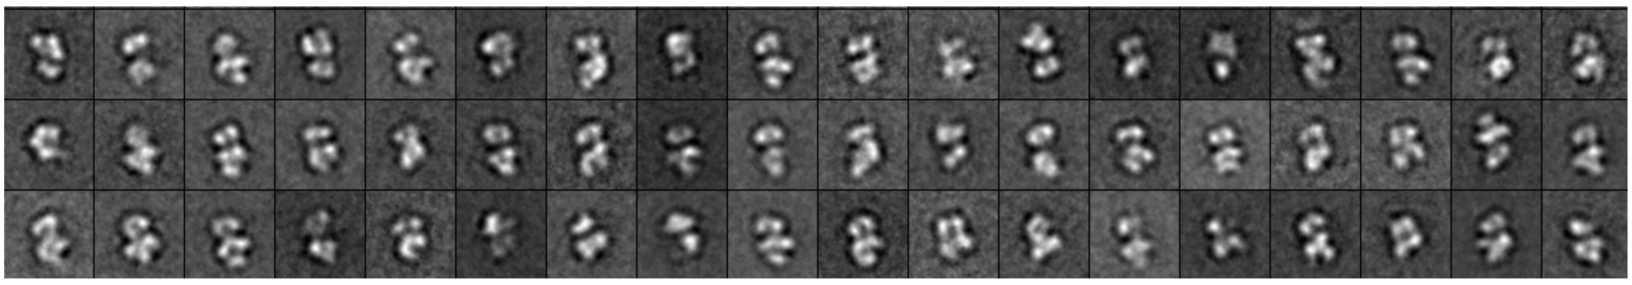

B

MBP-Asp1/MBP-Asp2/Asp3

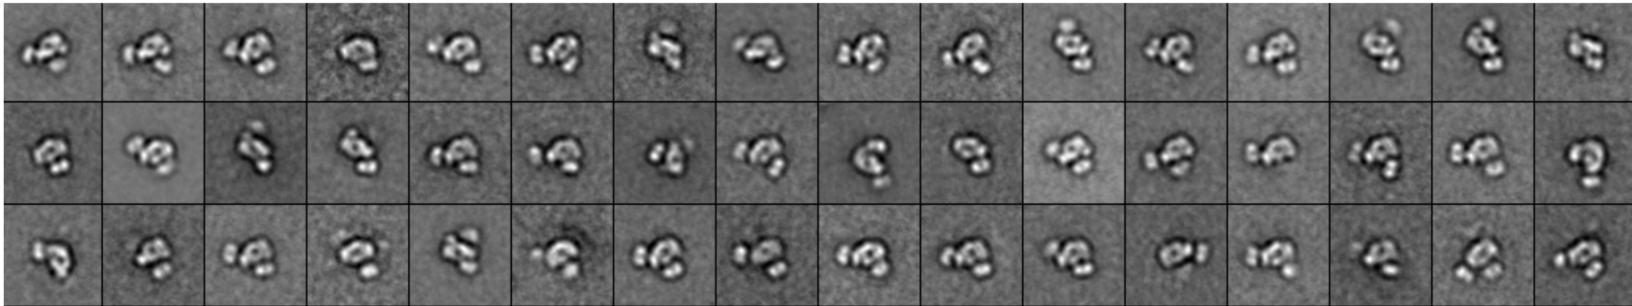

C

Asp1/MBP-Asp2/Asp3

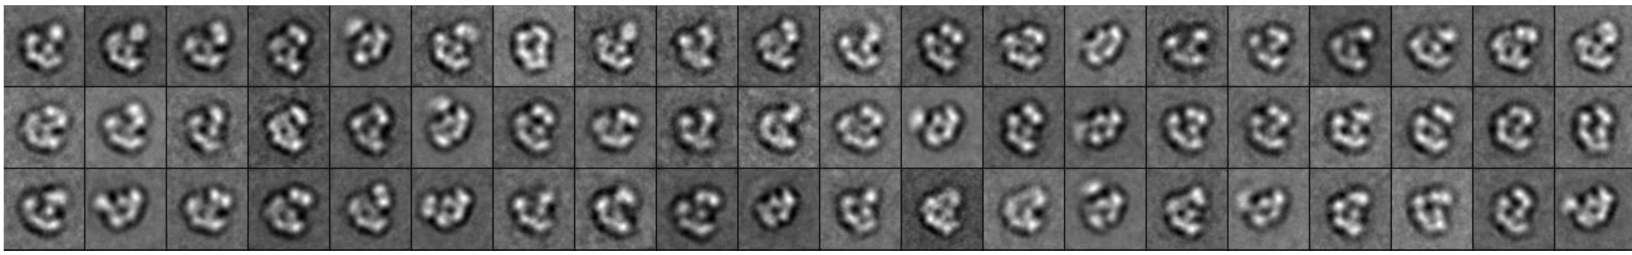

D

Asp1/Asp2/Asp3 (Dimer)

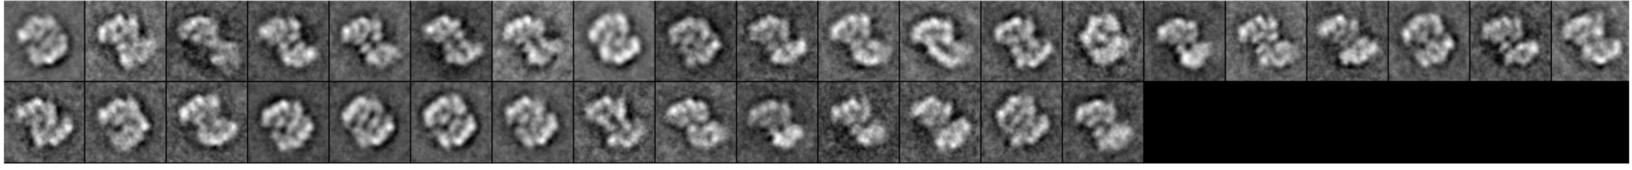

E

Asp1/Asp2/Asp3 (Monomer)

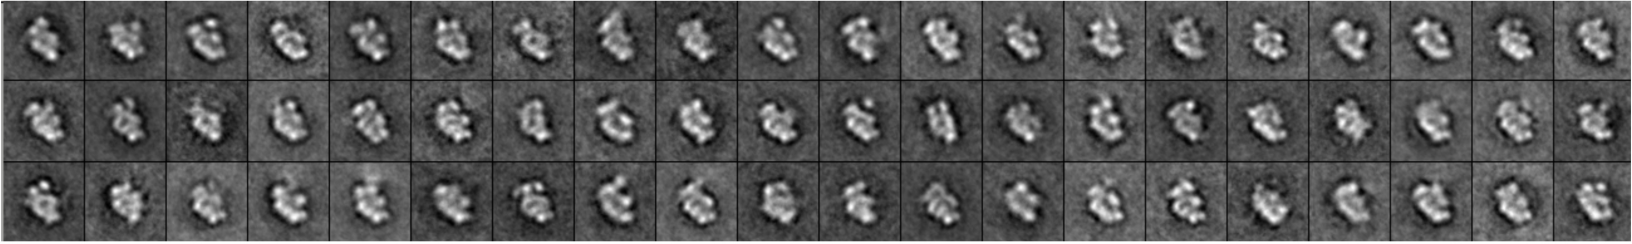

Figure S8

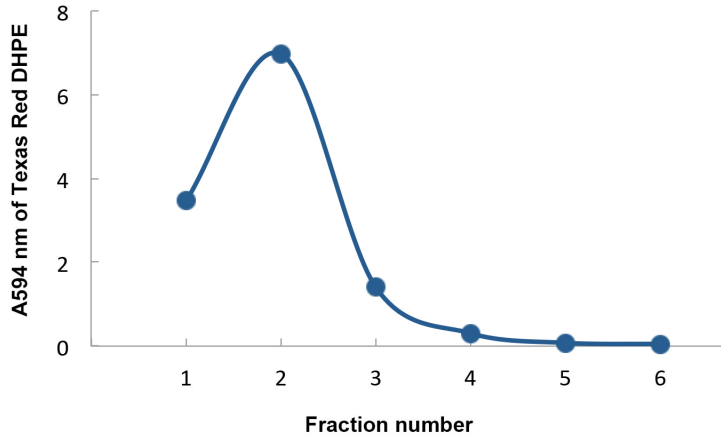

Figure S9

A

SecA2  
(*Streptococcus gordonii*)

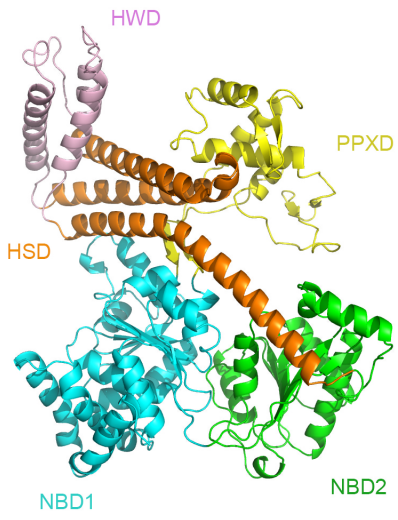

B

SecA2  
(*Streptococcus gordonii*)

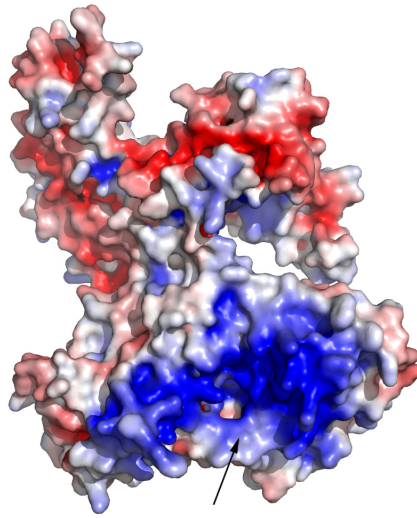

Basic Patch

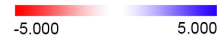

C

SecA1  
(*Streptococcus gordonii*)

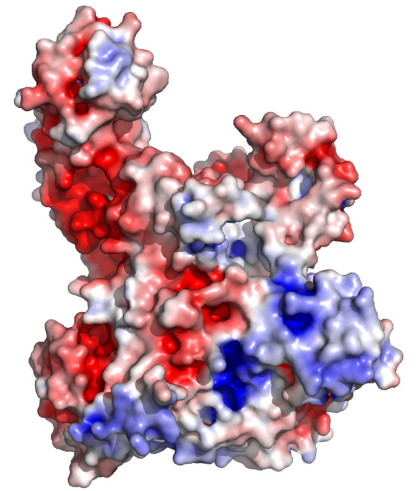

Table S1. Data collection and refinement statistics

|                                                                                                                                                                                                                                                                                                                                                                                                                                                                                                                                                                                                                                                                                                                                                | <i>S. gordonii</i> Asp1 | <i>S. gordonii</i> Asp1/3 complex |
|------------------------------------------------------------------------------------------------------------------------------------------------------------------------------------------------------------------------------------------------------------------------------------------------------------------------------------------------------------------------------------------------------------------------------------------------------------------------------------------------------------------------------------------------------------------------------------------------------------------------------------------------------------------------------------------------------------------------------------------------|-------------------------|-----------------------------------|
| <i>Data collection</i>                                                                                                                                                                                                                                                                                                                                                                                                                                                                                                                                                                                                                                                                                                                         |                         |                                   |
| Resolution limit (Å)                                                                                                                                                                                                                                                                                                                                                                                                                                                                                                                                                                                                                                                                                                                           | 2.77                    | 3.11                              |
| Space group                                                                                                                                                                                                                                                                                                                                                                                                                                                                                                                                                                                                                                                                                                                                    | P 1                     | C 2 2 2 <sub>1</sub>              |
| Cell dimensions                                                                                                                                                                                                                                                                                                                                                                                                                                                                                                                                                                                                                                                                                                                                |                         |                                   |
| <i>a</i> , <i>b</i> , <i>c</i> (Å)                                                                                                                                                                                                                                                                                                                                                                                                                                                                                                                                                                                                                                                                                                             | 41.50, 99.90, 179.07    | 152.60, 257.29, 217.72            |
| $\alpha$ , $\beta$ , $\gamma$ (°)                                                                                                                                                                                                                                                                                                                                                                                                                                                                                                                                                                                                                                                                                                              | 100.7, 90.1, 95.8       | 90.0, 90.0, 90.0                  |
| Total reflections                                                                                                                                                                                                                                                                                                                                                                                                                                                                                                                                                                                                                                                                                                                              | 211247                  | 1164890                           |
| Unique reflections                                                                                                                                                                                                                                                                                                                                                                                                                                                                                                                                                                                                                                                                                                                             | 66446                   | 77079                             |
| <i>R</i> <sub>merge</sub>                                                                                                                                                                                                                                                                                                                                                                                                                                                                                                                                                                                                                                                                                                                      | 0.166 (0.493)           | 0.145 (>1)                        |
| CC1/2                                                                                                                                                                                                                                                                                                                                                                                                                                                                                                                                                                                                                                                                                                                                          | 0.984 (0.684)           | 0.999 (0.784)                     |
| CC*                                                                                                                                                                                                                                                                                                                                                                                                                                                                                                                                                                                                                                                                                                                                            | 0.996 (0.901)           | 1 (0.937)                         |
| Mean <i>I</i> / $\sigma$ <i>I</i>                                                                                                                                                                                                                                                                                                                                                                                                                                                                                                                                                                                                                                                                                                              | 13.63 (2.72)            | 25.19 (2.35)                      |
| Completeness (%)                                                                                                                                                                                                                                                                                                                                                                                                                                                                                                                                                                                                                                                                                                                               | 92.70 (91.54)           | 99.48 (95.98)                     |
| Multiplicity                                                                                                                                                                                                                                                                                                                                                                                                                                                                                                                                                                                                                                                                                                                                   | 3.2 (1.9)               | 15.1 (15.6)                       |
| Wavelength (Å)                                                                                                                                                                                                                                                                                                                                                                                                                                                                                                                                                                                                                                                                                                                                 | 0.9789                  | 0.9789                            |
| <i>Refinement</i>                                                                                                                                                                                                                                                                                                                                                                                                                                                                                                                                                                                                                                                                                                                              |                         |                                   |
| Resolution range (Å)                                                                                                                                                                                                                                                                                                                                                                                                                                                                                                                                                                                                                                                                                                                           | 93.05 - 2.77            | 49.90 - 3.11                      |
| <i>R</i> <sub>work</sub> / <i>R</i> <sub>free</sub> (%)                                                                                                                                                                                                                                                                                                                                                                                                                                                                                                                                                                                                                                                                                        | 20.83 / 28.16           | 20.69 / 24.83                     |
| No. non-hydrogen atoms                                                                                                                                                                                                                                                                                                                                                                                                                                                                                                                                                                                                                                                                                                                         | 17260                   | 21840                             |
| Protein                                                                                                                                                                                                                                                                                                                                                                                                                                                                                                                                                                                                                                                                                                                                        | 17257                   | 21756                             |
| Solvent                                                                                                                                                                                                                                                                                                                                                                                                                                                                                                                                                                                                                                                                                                                                        | 3                       | 84                                |
| Average B-factor (Å <sup>2</sup> )                                                                                                                                                                                                                                                                                                                                                                                                                                                                                                                                                                                                                                                                                                             | 50.57                   | 29.22                             |
| Protein                                                                                                                                                                                                                                                                                                                                                                                                                                                                                                                                                                                                                                                                                                                                        | 50.57                   | 29.29                             |
| Solvent                                                                                                                                                                                                                                                                                                                                                                                                                                                                                                                                                                                                                                                                                                                                        | 33.14                   | 11.51                             |
| <i>R.m.s</i> deviations                                                                                                                                                                                                                                                                                                                                                                                                                                                                                                                                                                                                                                                                                                                        |                         |                                   |
| Bond lengths (Å)                                                                                                                                                                                                                                                                                                                                                                                                                                                                                                                                                                                                                                                                                                                               | 0.009                   | 0.010                             |
| Bond angles (°)                                                                                                                                                                                                                                                                                                                                                                                                                                                                                                                                                                                                                                                                                                                                | 1.09                    | 1.29                              |
| Ramachandran analysis (%)                                                                                                                                                                                                                                                                                                                                                                                                                                                                                                                                                                                                                                                                                                                      |                         |                                   |
| Favored                                                                                                                                                                                                                                                                                                                                                                                                                                                                                                                                                                                                                                                                                                                                        | 90.8                    | 92.9                              |
| Allowed                                                                                                                                                                                                                                                                                                                                                                                                                                                                                                                                                                                                                                                                                                                                        | 8.4                     | 6.7                               |
| Outliers                                                                                                                                                                                                                                                                                                                                                                                                                                                                                                                                                                                                                                                                                                                                       | 0.8                     | 0.4                               |
| <p>Statistics for the highest-resolution shell are shown in parentheses. <math>R_{\text{merge}} = \frac{\sum_{hkl} \sum_i  I_i(hkl) - \langle I(hkl) \rangle }{\sum_{hkl} \sum_i I_i(hkl)}</math>, where <math>I(hkl)</math> is the integrated intensity of the reflection. <math>R = \frac{\sum  F_{\text{obs}} - F_{\text{calc}} }{\sum F_{\text{obs}}}</math>, where <math>F_{\text{obs}}</math> and <math>F_{\text{calc}}</math> are observed and calculated structure factors, respectively. <i>R</i><sub>free</sub> was calculated with 5% of the reflections. CC1/2 is defined as the correlation coefficient between intensities from random half datasets. CC* describes the CC of the full dataset against the true intensities.</p> |                         |                                   |
